# Supplementary material for: Proteomic Analysis of Signaling Network Regulation in Renal Cell Carcinomas with Differential Hypoxia-Inducible Factor-2α Expression
Source: PubMed Central journal article supplement (PMC3733962; doi:10.1371/journal.pone.0071654), 2013-08-05

Figure S2

A

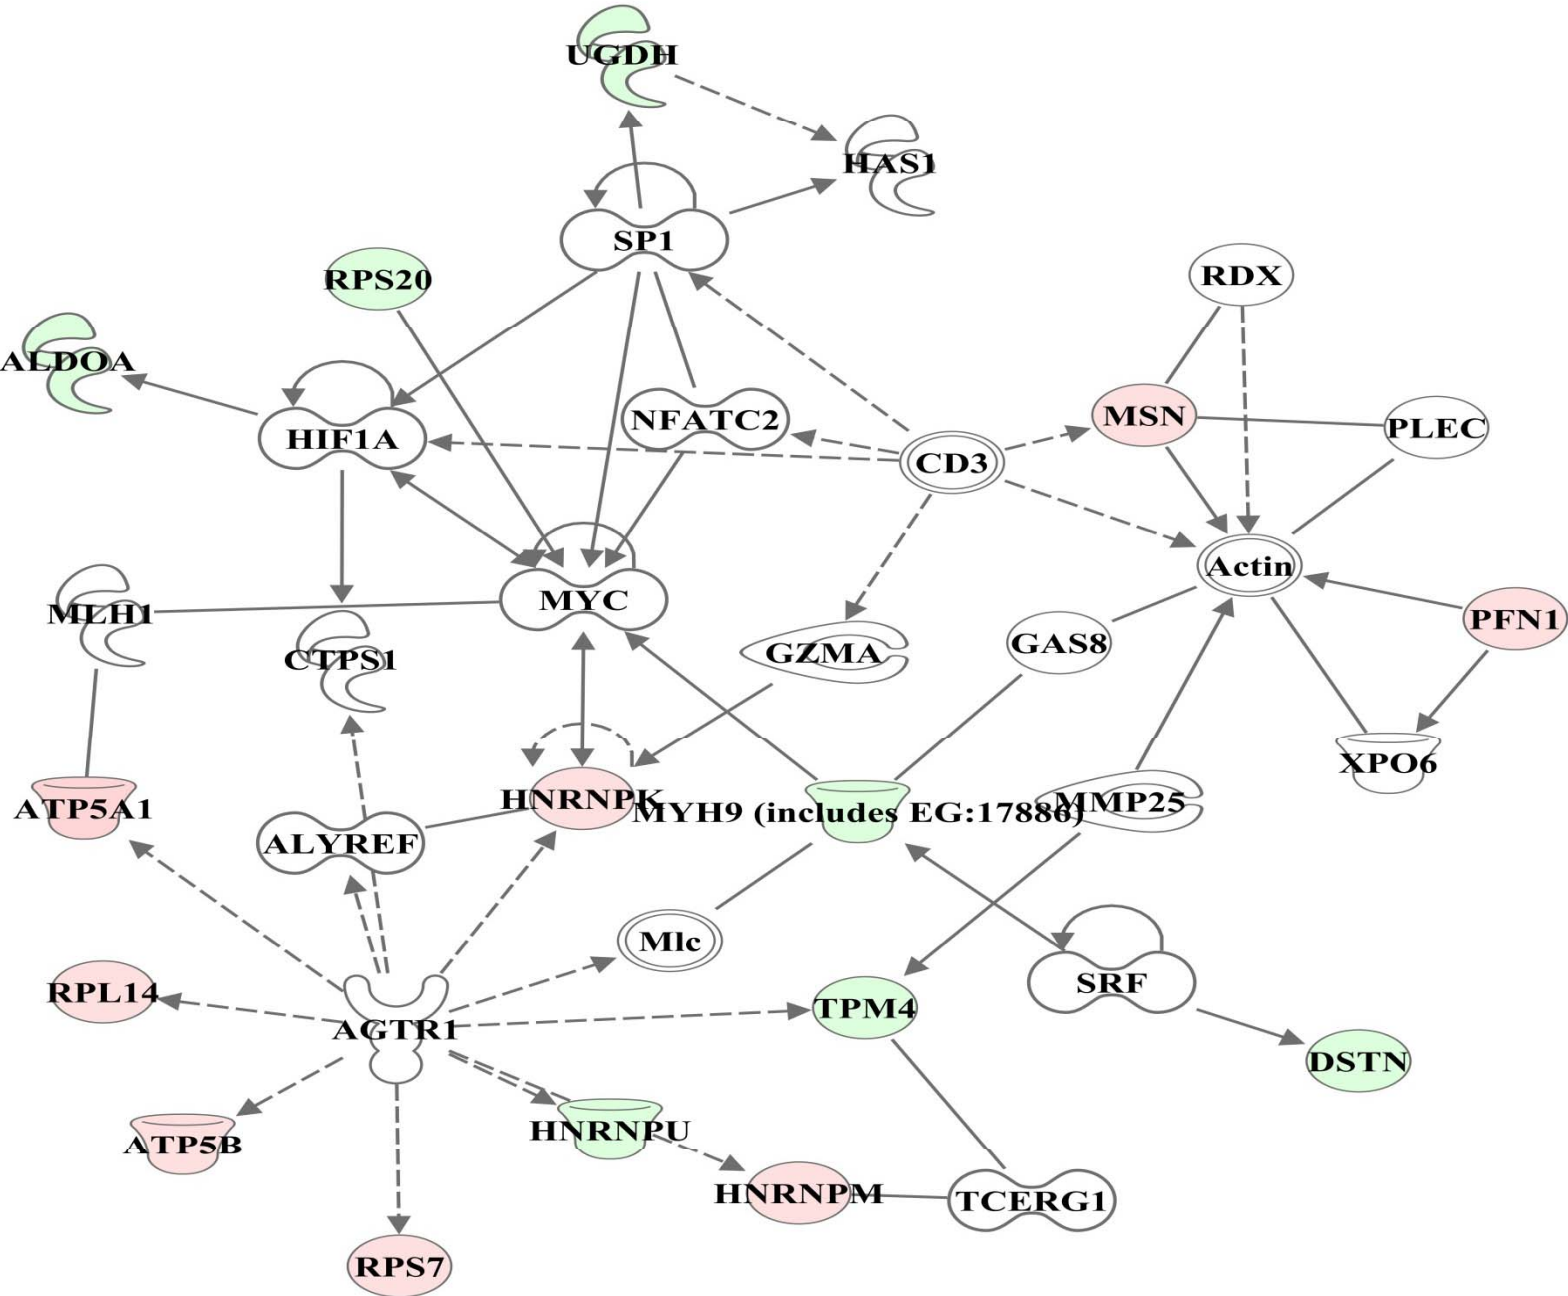

Figure S2 (cont.)

B

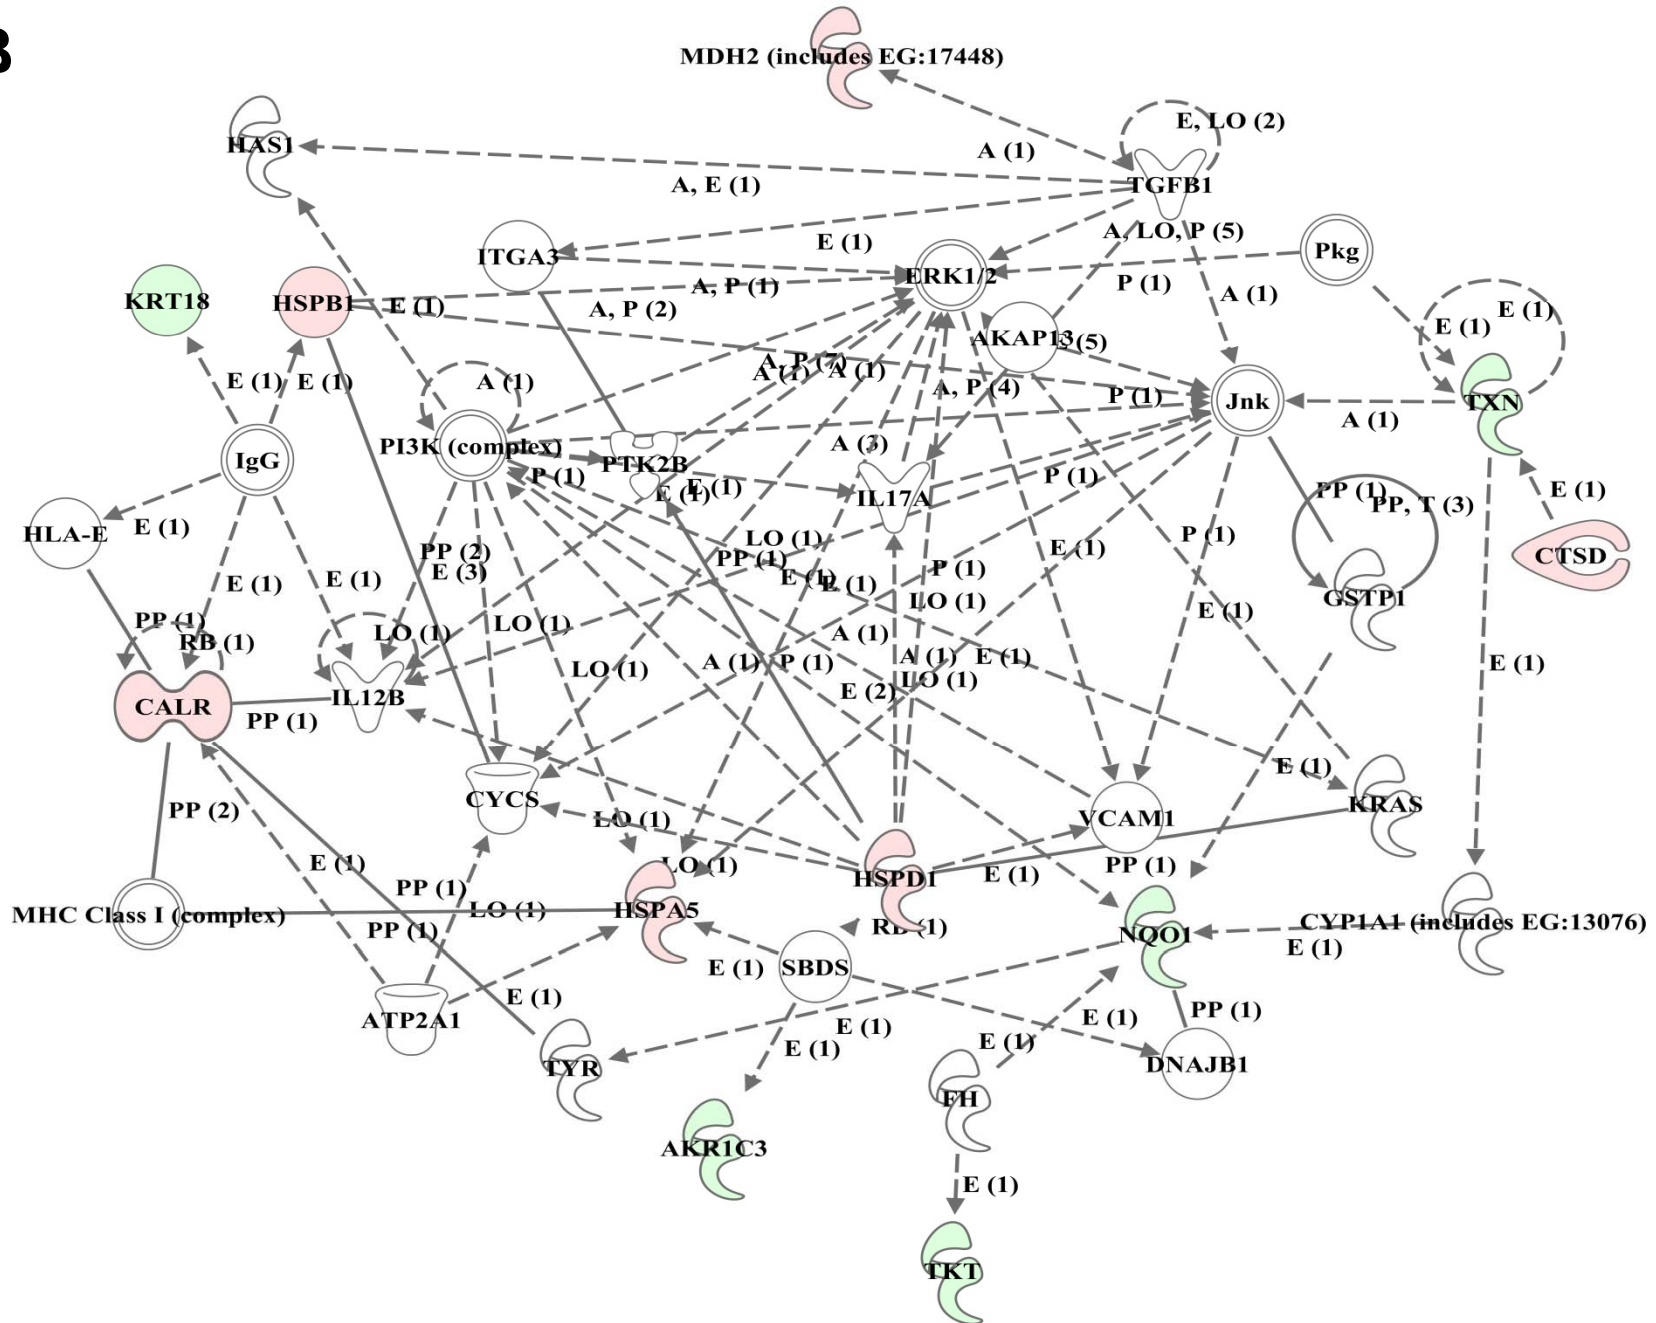

**Figure S2** (cont.)

**C**

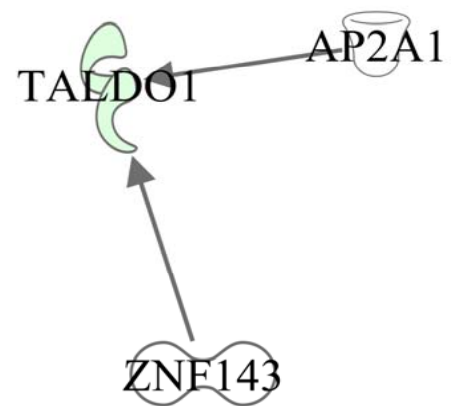

Figure S2 (cont.)

D

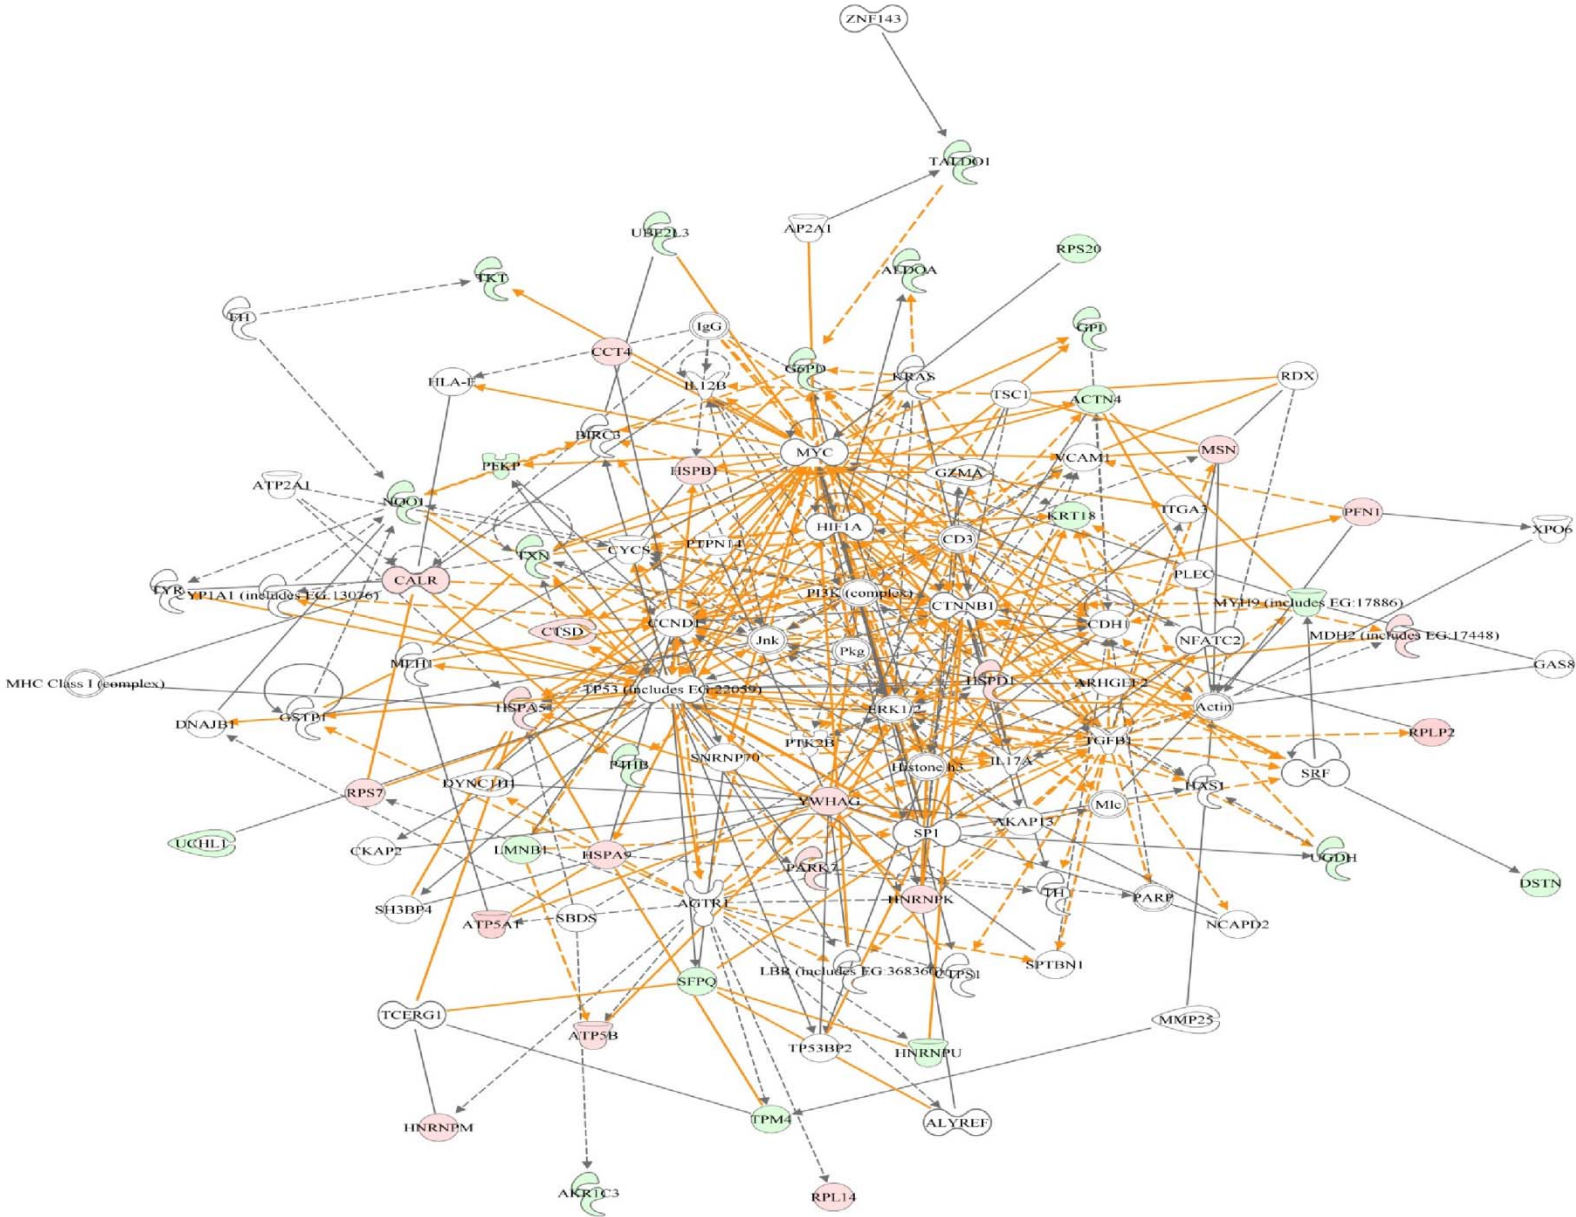

Supplement: pone.0071654.s002.pdf [file pone.0071654.s002.pdf]
