# Supplementary material for: Proteomic Analysis of Signaling Network Regulation in Renal Cell Carcinomas with Differential Hypoxia-Inducible Factor-2α Expression
Source: PubMed Central journal article supplement (PMC3733962; doi:10.1371/journal.pone.0071654), 2013-08-05

Figure S4

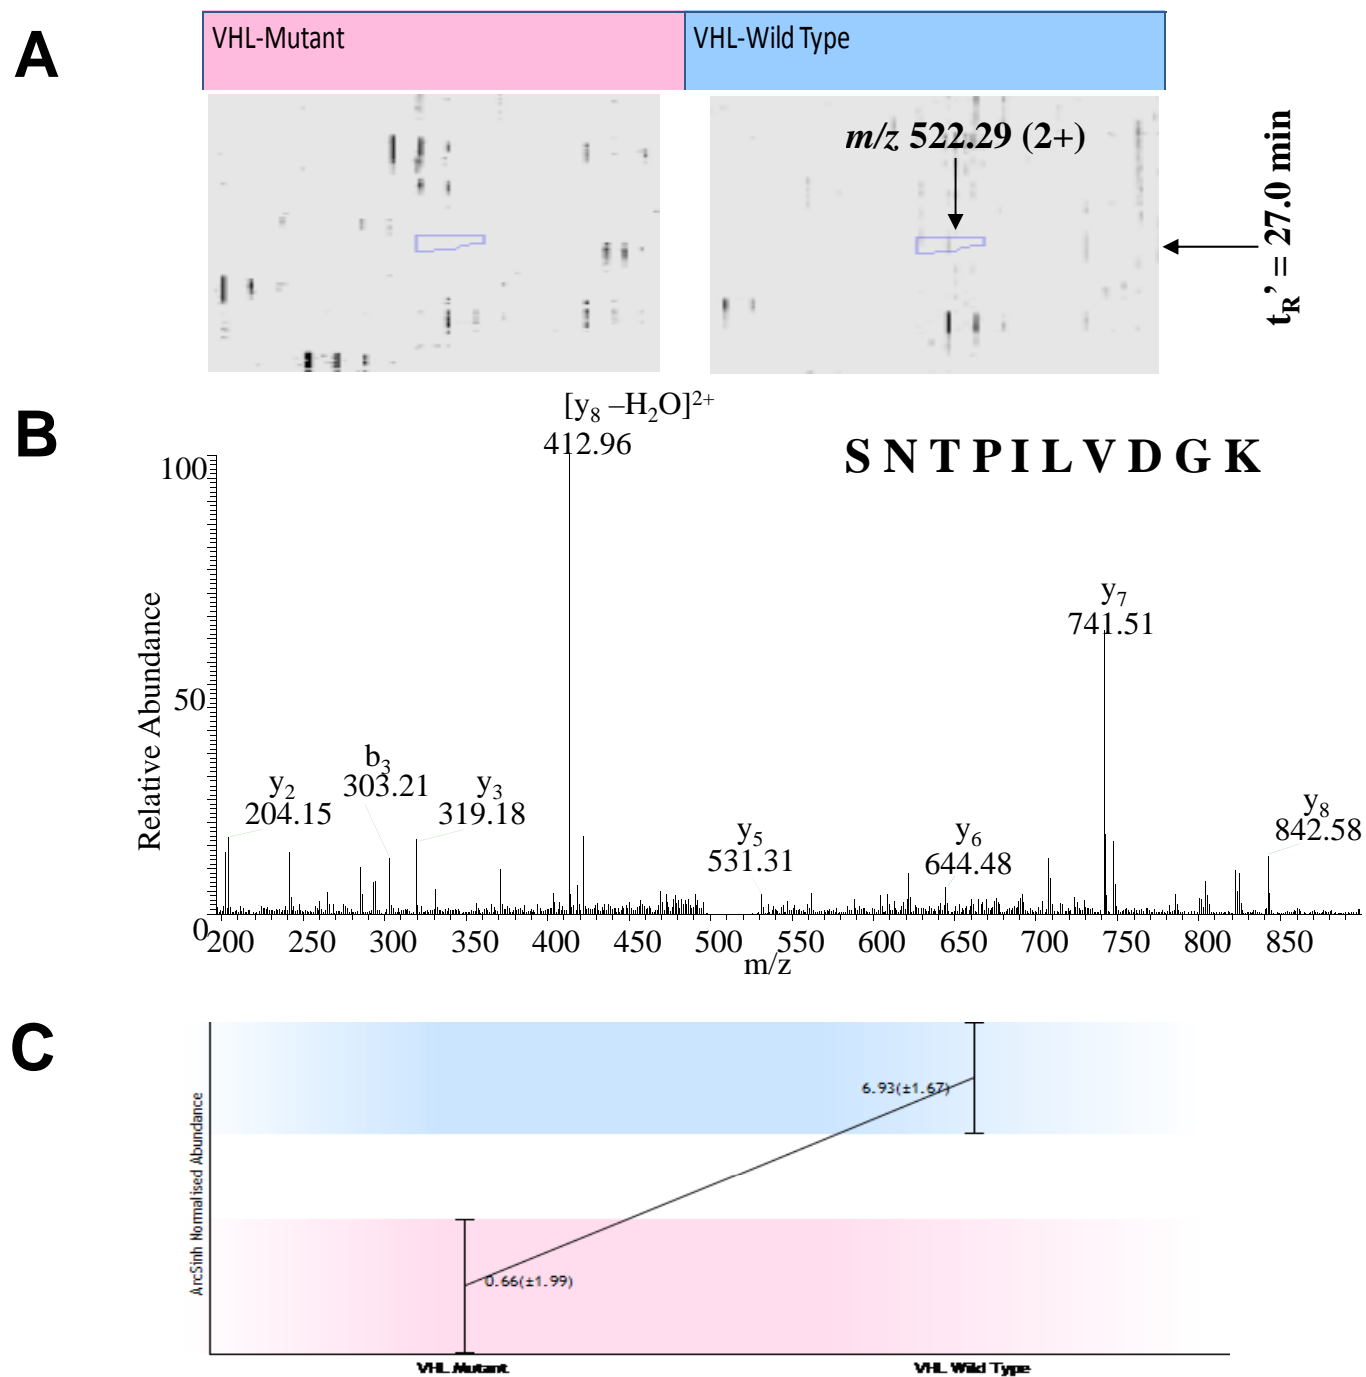

Supplement: pone.0071654.s004.pdf [file pone.0071654.s004.pdf]
